# Supplementary material for: Electronic regulation of a core–shell NiSe2 catalyst by Co doping to accelerate hydrogen evolution
Source: Royal Society of Chemistry journal article supplement (doi:10.1039/d2ce01169g), 2022-01-01
Supplement: d2ce01169g1.pdf [file d2ce01169g1.pdf]

# Electronic Regulation of NiSe<sub>2</sub> by Co doping for Accelerating Hydrogen Evolution Reaction

Huakai Xu, Kebin Lu, Chuanhai Jiang, Xiaofei Wei, Zhifei Wang, Yuguo Ouyang, Fangna Dai\*

School of Materials Science and Engineering, China University of Petroleum (East China), Qingdao

266580, China

\*Corresponding Author: [fndai@upc.edu.cn](mailto:fndai@upc.edu.cn).

## Theoretical calculation

The theoretical calculations in the DFT framework was based on the VASP package. Exchange correlation energies were treated using a generalized gradient approximation with the Perdew–Burke–Ernzerhof function (GGA-PBE). Projector-augmented wave potential was used to describe the ion–electron interaction, and the plane wave cutoff energy was set to 350 eV. The k-point sampling was obtained from the Monkhorst–Pack scheme with a  $(3 \times 3 \times 1)$  mesh for optimization and a  $(20 \times 20 \times 1)$  mesh for DOS calculation. The geometry optimization and energy calculation are finished when the electronic self-consistent iteration and force were reach  $10^{-4}$  eV and  $0.01 \text{ eV} \cdot \text{\AA}^{-1}$ , respectively.

The structure was modelled from the NiSe<sub>2</sub> (0 0 1) and CoSe<sub>2</sub> (0 0 1) plane, the supercell with a lattice constant of  $14.3 \text{ \AA} \times 14.5 \text{ \AA}$  is consisted of 96 atoms separated by a vacuum region of  $15 \text{ \AA}$  along the direction normal to the sheet plane to avoid strong interactions. In the process of structural optimization, the bottom atom of catalyst is fixed and only the upper two layers are released.

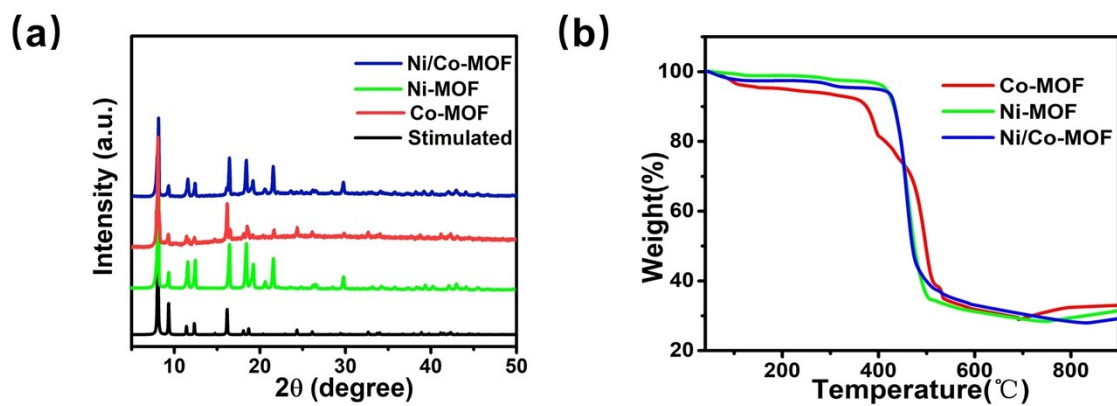

Figure S1 (a) XRD patterns; (b) TGA of MOF nanosheets.

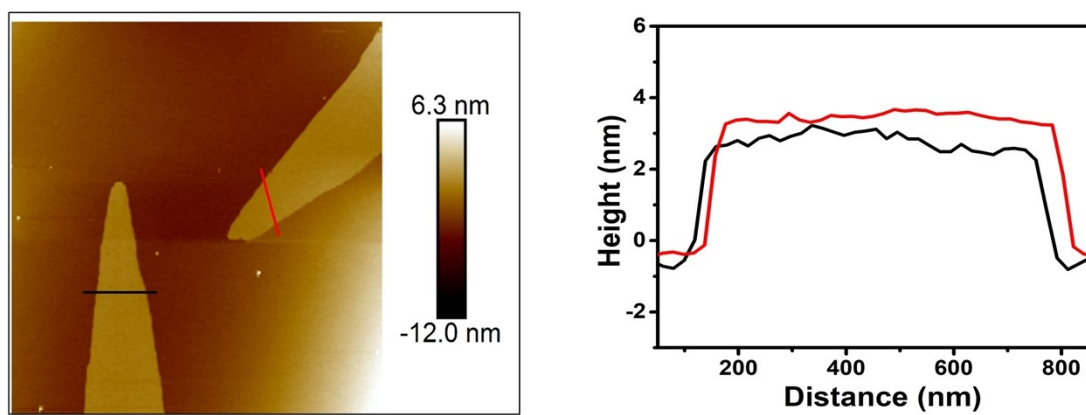

Figure S2. AFM images of ultrathin MOF nanosheets

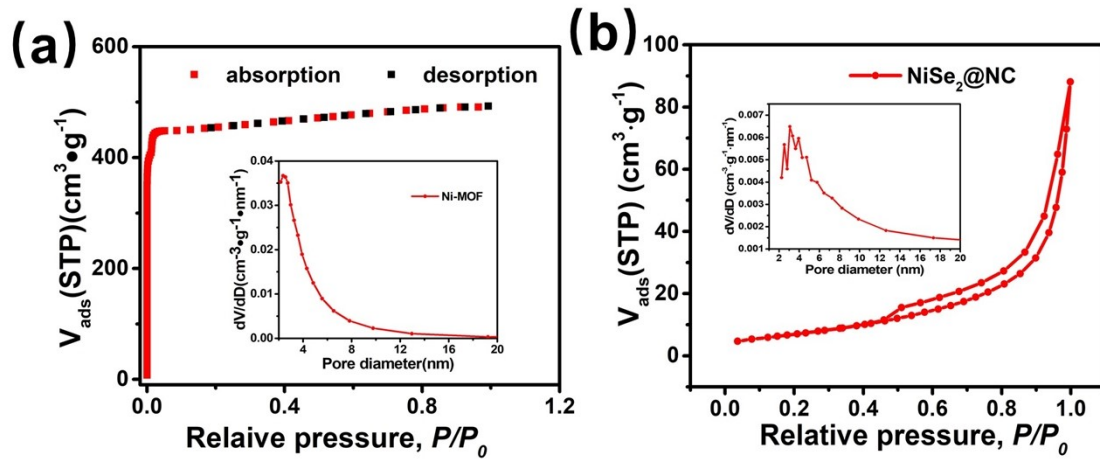

Figure S3. (a) N<sub>2</sub> adsorption-desorption isotherms of ultrathin layered Ni-MOF and NiSe<sub>2</sub>@NC (The illustration shows the pore size distribution diagram).

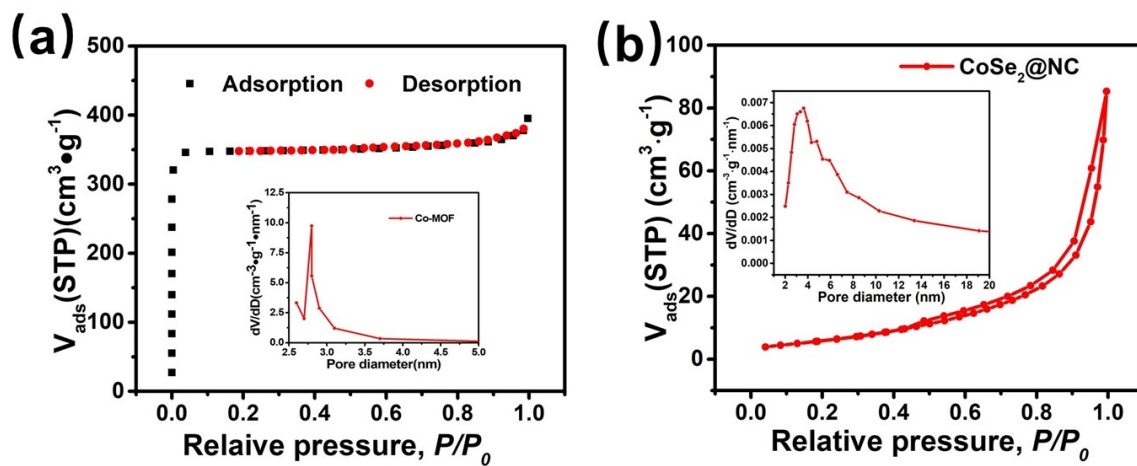

Figure S4. (a) N<sub>2</sub> adsorption-desorption isotherms of ultrathin layered Co-MOF and CoSe<sub>2</sub>@NC (The illustration shows the pore size distribution diagram).

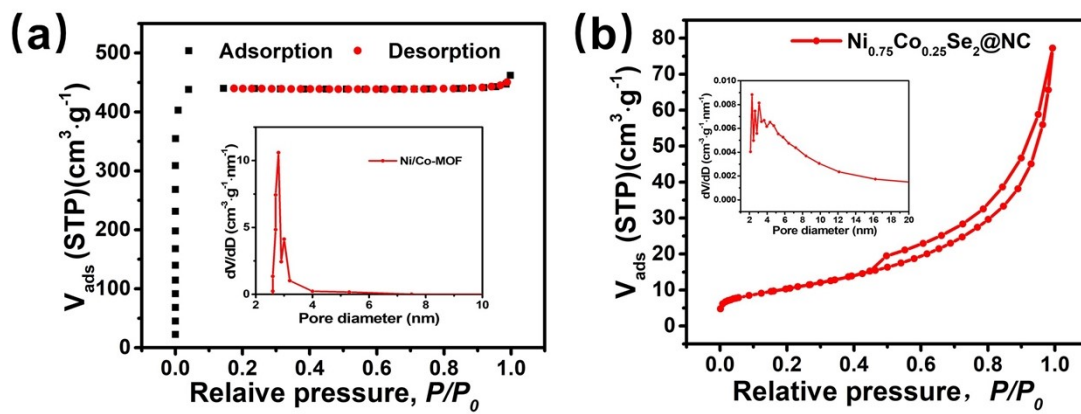

Figure S5. (a)  $N_2$  adsorption-desorption isotherms of ultrathin layered Ni/Co-MOF and  $Ni_{0.75}Co_{0.25}Se_2@NC$  (The illustration shows the pore size distribution diagram).

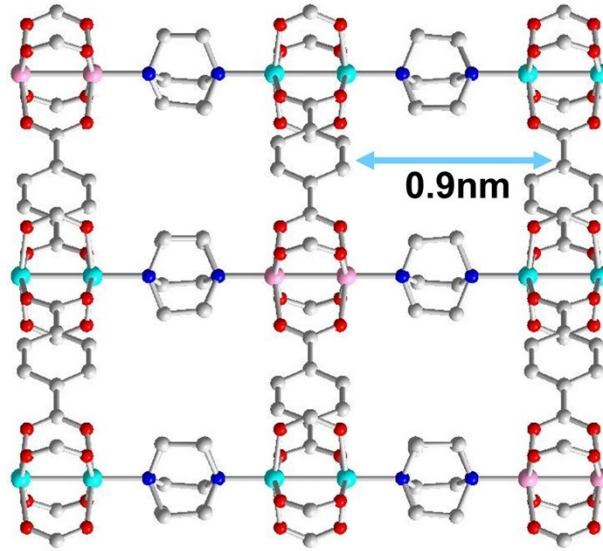

Figure S6. The pillar-layered structure of ultrathin layered MOF (Ni, blue; Co, pink; N, deep blue; O, red; C, gray).

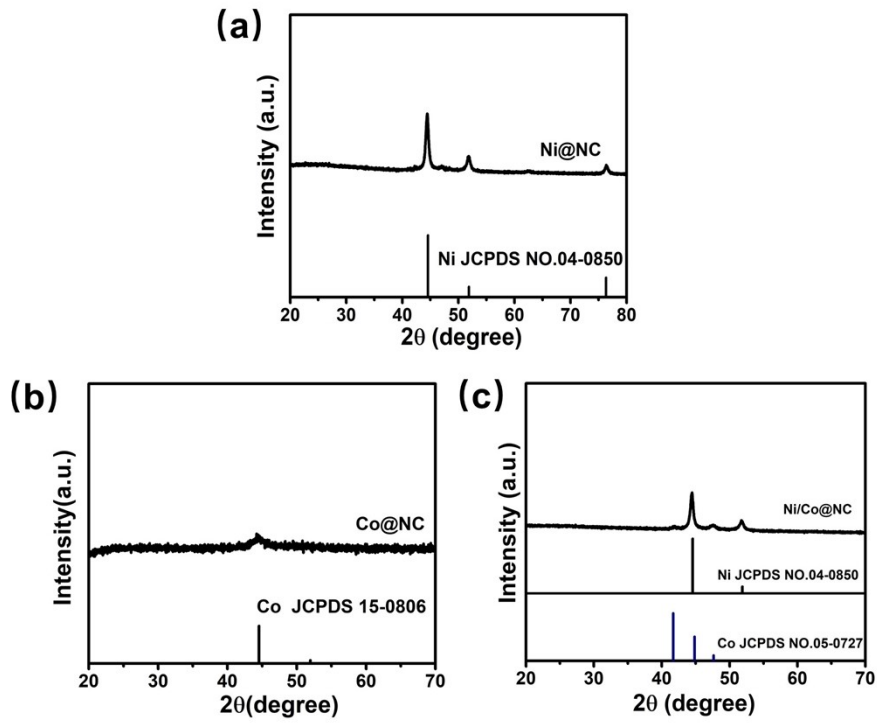

Figure S7 XRD pattern of Ni@NC, Co@NC, Ni/Co@NC

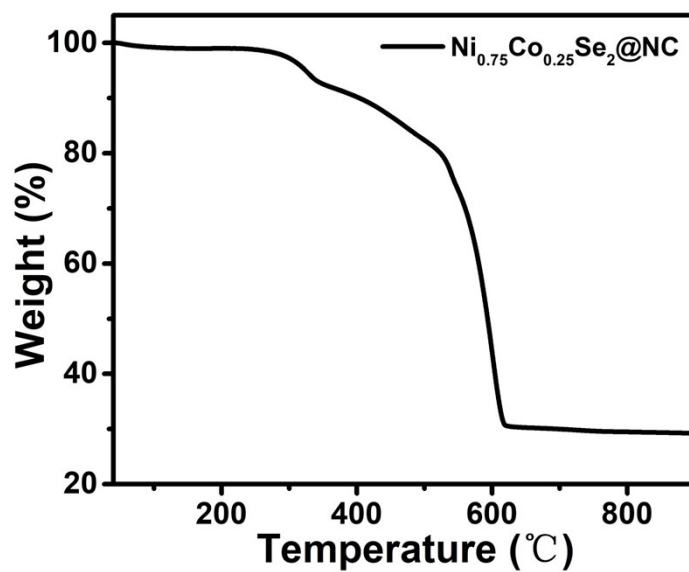

Figure S8 TGA curve of  $\text{Ni}_{0.75}\text{Co}_{0.25}\text{Se}_2@\text{NC}$  nanomaterials performed in the  $\text{O}_2$  atmosphere.

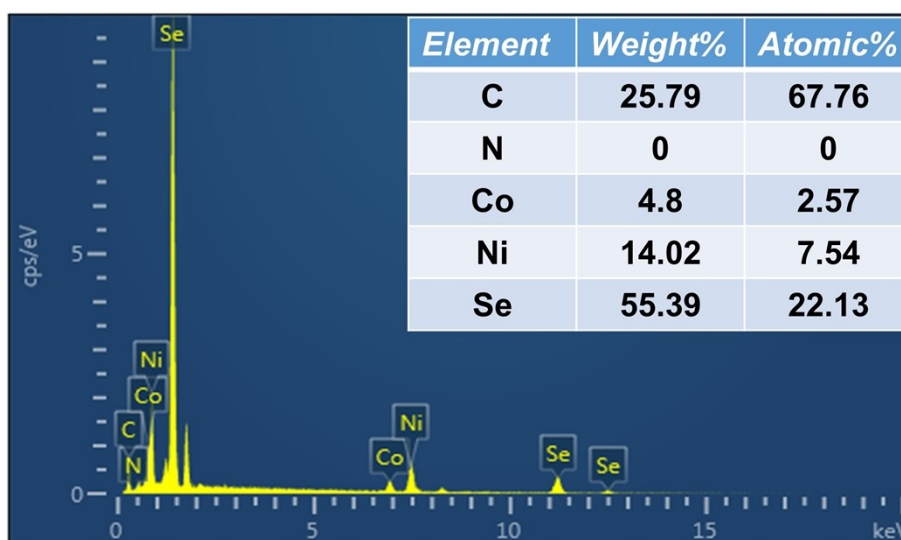

Figure S9. Energy dispersive spectra of  $\text{Ni}_{0.75}\text{Co}_{0.25}\text{Se}_2@\text{NC}$  nanomaterials.

| Elements |    | Molar ratio (Ni: Co) |
|----------|----|----------------------|
| Ni       | Co | 1.004: 0.33027       |

Figure S10 Elements percentage of  $\text{Ni}_{0.75}\text{Co}_{0.25}\text{Se}_2@\text{NC}$  obtained from ICP-OES

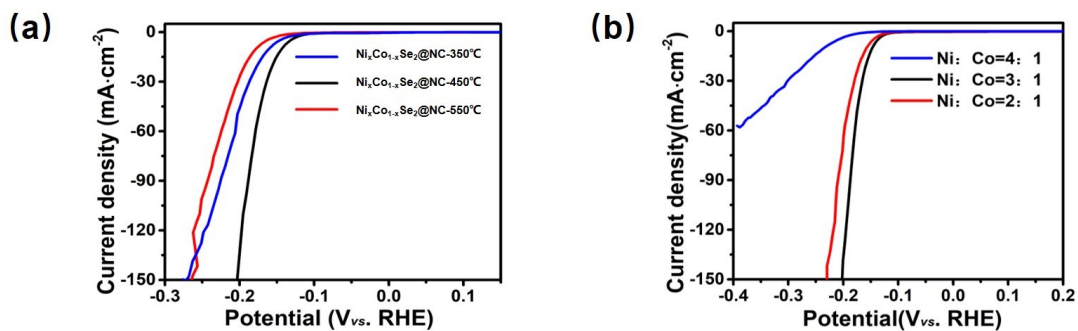

Figure S11 LSV curves for  $\text{Ni}_{0.75}\text{Co}_{0.25}\text{Se}_2@\text{NC}$ : (a) with different mass ratios of Ni and Co (2:1, 3:1, 4:1); (b) with different synthesis temperature (350°C, 450°C and 550°C)

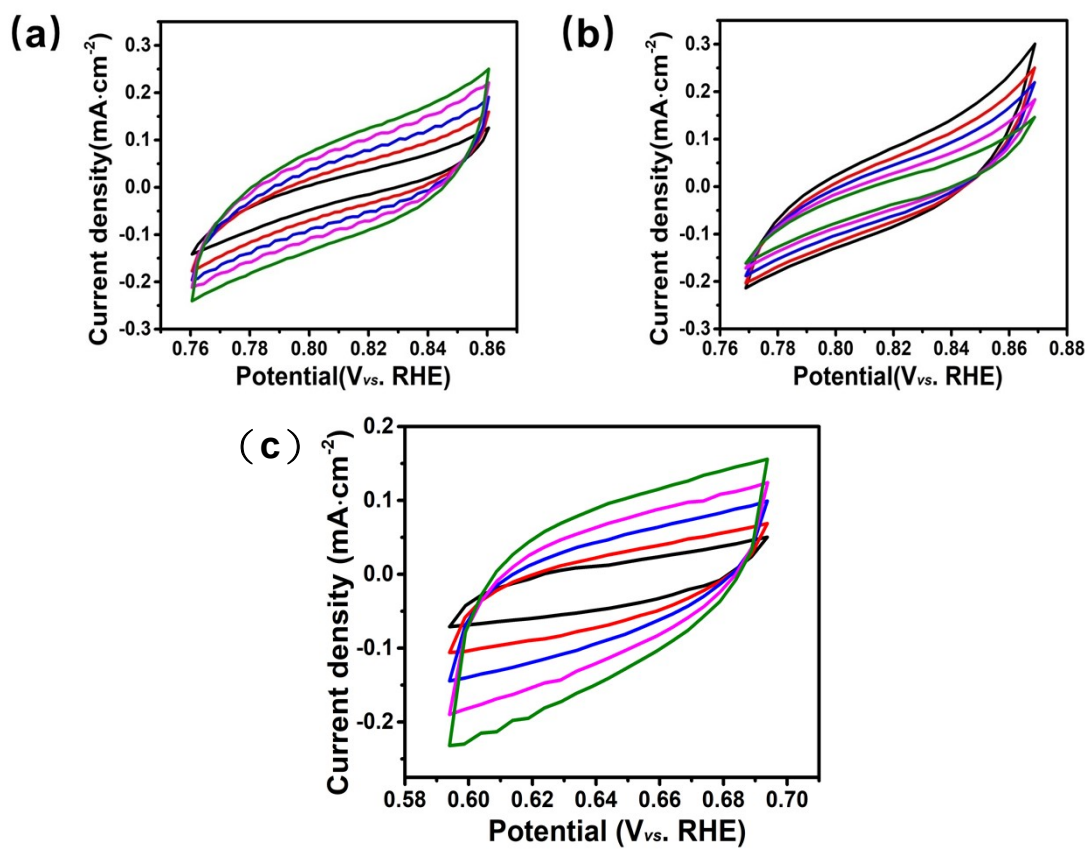

Figure S12. The CV curves of (a)  $\text{CoSe}_2@\text{NC}$ , (b)  $\text{NiSe}_2@\text{NC}$  and (c)  $\text{Ni}_{0.75}\text{Co}_{0.25}\text{Se}_2@\text{NC}$ .



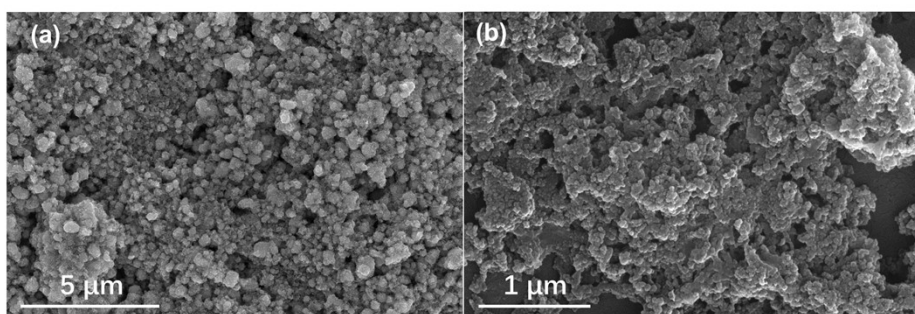

Figure S13 The SEM of  $\text{Ni}_{0.75}\text{Co}_{0.25}\text{Se}_2@\text{NC}$  (a) before and (b) after stability test.

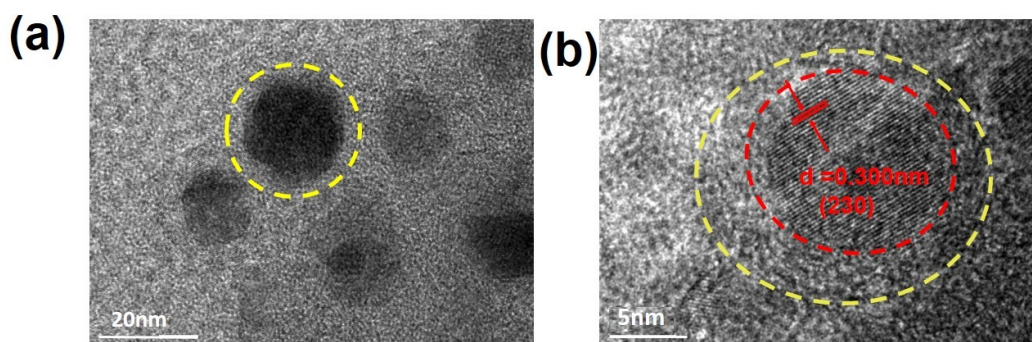

Figure S14 the TEM and HR-TEM of  $\text{Ni}_{0.75}\text{Co}_{0.25}\text{Se}_2@\text{NC}$  after stability test.

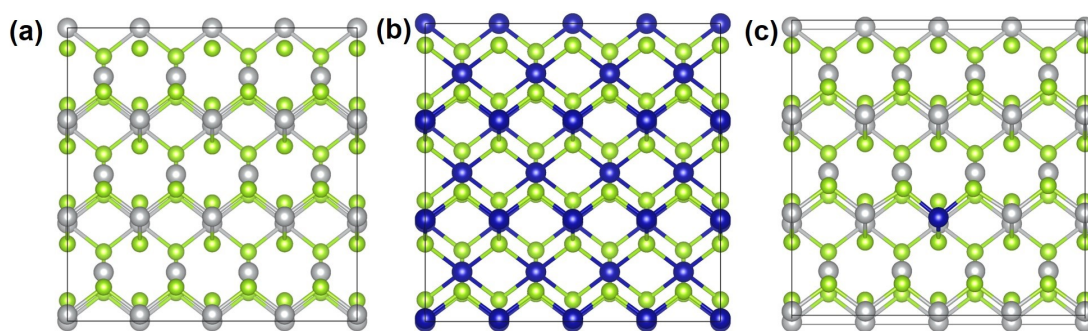

Figure S15 the model of (a)  $\text{NiSe}_2$ , (b)  $\text{CoSe}_2$ , (c)  $\text{Co}_1\text{-NiSe}_2$ .

Table S1. Comparison of HER catalytic activity of different Co-doped catalysts in 0.5 M H<sub>2</sub>SO<sub>4</sub>

| HER catalysts                                       | E10 (mV) | Tafel slope (mV·dec <sup>-1</sup> ) | Electrolyte                          | Ref.      |
|-----------------------------------------------------|----------|-------------------------------------|--------------------------------------|-----------|
| Ni <sub>0.75</sub> Co <sub>0.25</sub> Se@NC         | 143      | 37.5                                | 0.5 M H <sub>2</sub> SO <sub>4</sub> | This work |
| Co-MoS <sub>2</sub> /rGO                            | 147      | 49.5                                | 0.5 M H <sub>2</sub> SO <sub>4</sub> | [1]       |
| Fe <sub>0.7</sub> Co <sub>0.3</sub> Se/RGO-12       | 166      | 36                                  | 0.5 M H <sub>2</sub> SO <sub>4</sub> | [2]       |
| Co10%-VS <sub>2</sub>                               | 234      | 93                                  | 0.5 M H <sub>2</sub> SO <sub>4</sub> | [3]       |
| Co13%-NiS <sub>2</sub> /CoS <sub>2</sub>            | 162.3    |                                     | 0.5 M H <sub>2</sub> SO <sub>4</sub> | [4]       |
| Co-MoSe <sub>2</sub>                                | 217      | 65                                  | 0.5 M H <sub>2</sub> SO <sub>4</sub> | [5]       |
| Co- <sup>S</sup> MoS <sub>2</sub>                   | 220      | 92                                  | 0.5 M H <sub>2</sub> SO <sub>4</sub> | [6]       |
| Co <sub>x</sub> Mo <sub>1-x</sub> S <sub>2</sub>    | 357      | 120                                 | 0.5 M H <sub>2</sub> SO <sub>4</sub> | [7]       |
| Co-VSe <sub>2</sub>                                 | 230      | 36.1                                | 0.5 M H <sub>2</sub> SO <sub>4</sub> | [8]       |
| Co-WSe <sub>2</sub> /MWNTs                          | 147      | 37                                  | 0.5 M H <sub>2</sub> SO <sub>4</sub> | [9]       |
| Ni <sub>1/3</sub> Co <sub>2/3</sub> Se <sub>2</sub> | 145      | 46.3                                | 0.5 M H <sub>2</sub> SO <sub>4</sub> | [10]      |

## REFERENCES

- [1] J. W. Ma, A. Cai, X. L. Guan, K. Li, W. C. Peng, X. B. Fan, G. L. Zhang, F. B. Zhang and Y. Li, *Int. J. Hydrog. Energy*, 2020, **45**, 9583-9591.
- [2] X. W. Xu, Y. C. Ge, M. Wang, Z. Q. Zhang, P. Dong, R. Baines, M. X. Ye and J. F. Shen, *ACS Appl. Mater. Interfaces*, 2016, **8**, 18036-18042.
- [3] M. X. Zhao, M. Y. Yang, W. J. Huang, W. C. Liao, H. D. Bian, D. Z. Chen, L. Wang, J. N. Tang and C. Liu, *ChemCatChem*, 2021, **13**, 2138-2144.
- [4] Z. H. Peng, S. Lou, Y. Gao, L. J. Kong, S. C. Yan, K. Wang and H. Z. Song, *Nanomaterials*, 2021, **11**, 1245.
- [5] O. Zimron, T. Zilberman, S. R. Kadam, S. Ghosh, S. -L. Kolatker, A. Neyman, R. Bar-Ziv and M. Bar-Sadan, *Isr. J. Chem.* 2020, **60**, 624-629.
- [6] T. Lau, X. W. Lu, J. Kulhavy, S. Wu, L. L. Lu, T. -S. Wu, R. Kato, J. Foord, Y.-L. Soo, K. Suenag and S. C. E. Tsang, *Chem. Sci.*, 2018, **9**, 4769-4776.
- [7] J. Pan, C. S. Song, X. Wang, X. T. Yuan, Y. Q. Fang, C. G. Guo, W. Zhao and F. Q. Huang, *Inorg. Chem. Front.*, 2017, **4**, 1895.
- [8] Q. Zhu, M.M. Shao, S. H. Yu, X. N. Wang, Z. Tang, B. Chen, H. Cheng, Z. G. Lu, D. Chua H. Pan, *ACS Appl. Energy Mater.*, 2019, **2**, 644-653.
- [9] X. L. Zheng, G. Y. Zhang, X. P. Xu, L. Liu, J. N. Zhang and Q. Xu, *Appl. Surf. Sci.*, 2019, **496**, 143694.
- [10] Z. Zhang, Y. D. Liu, L. Ren, H. Zhang, Z. Y. Huang, X. Qi, X. L. Wei and J. X. Zhong, *Electrochim. Acta*, 2016, **200**, 142-151.
